# Supplementary material for: Graphene oxide–Li+@C60 donor–acceptor composites for photoenergy conversion
Source: Royal Society of Chemistry journal article supplement (doi:10.1039/c5cp01403d), 2015-01-01
Supplement: c5cp01403d1.pdf [file c5cp01403d1.pdf]

ELECTRONIC SUPPLEMENTARY INFORMATION

**Graphene oxide–Li<sup>+</sup>@C<sub>60</sub> donor-acceptor composite for  
photoenergy conversion**

Mustafa Supur,<sup>a</sup> Yuki Kawashima,<sup>a</sup> Kei Ohkubo,<sup>a</sup> Hayato Sakai,<sup>b</sup> Taku Hasobe<sup>b</sup> and  
Shunichi Fukuzumi<sup>\*acd</sup>

<sup>a</sup>*Department of Material and Life Science, Graduate School of Engineering, Osaka  
University, ALCA and SENTAN, Japan Science and Technology Agency (JST), Suita, Osaka  
565-0871, Japan*

<sup>b</sup>*Department of Chemistry, Faculty of Science and Technology, Keio University, Yokohama,  
Kanagawa 223-8522, Japan*

<sup>c</sup>*Department of Bioinspired Science, Ewha Womans University, Seoul 120-750, Korea*

<sup>d</sup>*Faculty of Science and Engineering, Meijo University, ALCA and SENTAN, Japan  
Science and Technology Agency (JST), Nagoya, Aichi 468-0073, Japan*

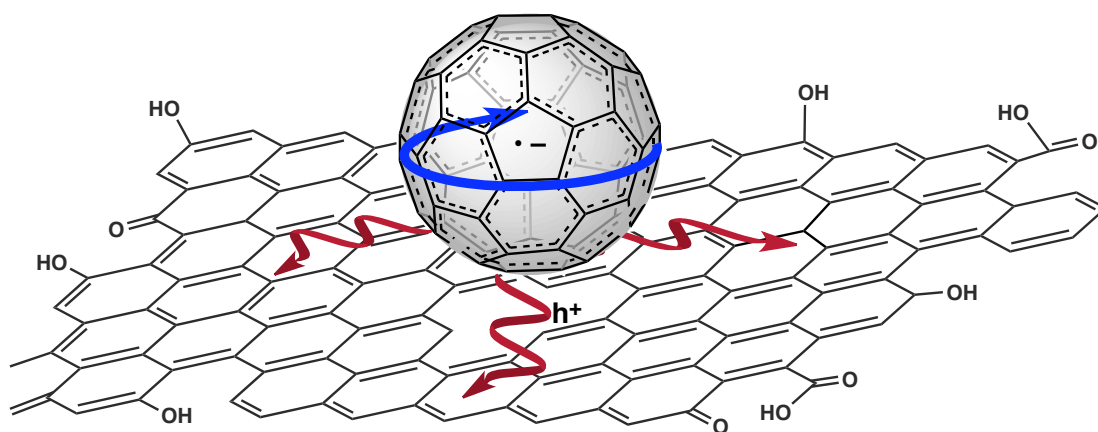

**Fig. S1** Representation of the delocalization of radical anion of the fullerene on the  $\pi$ -sphere and the hole migration through the  $\pi$ -conjugations on an assumed portion of a GO surface proposed to occur after the photoinduced electron transfer from GO to fullerene.

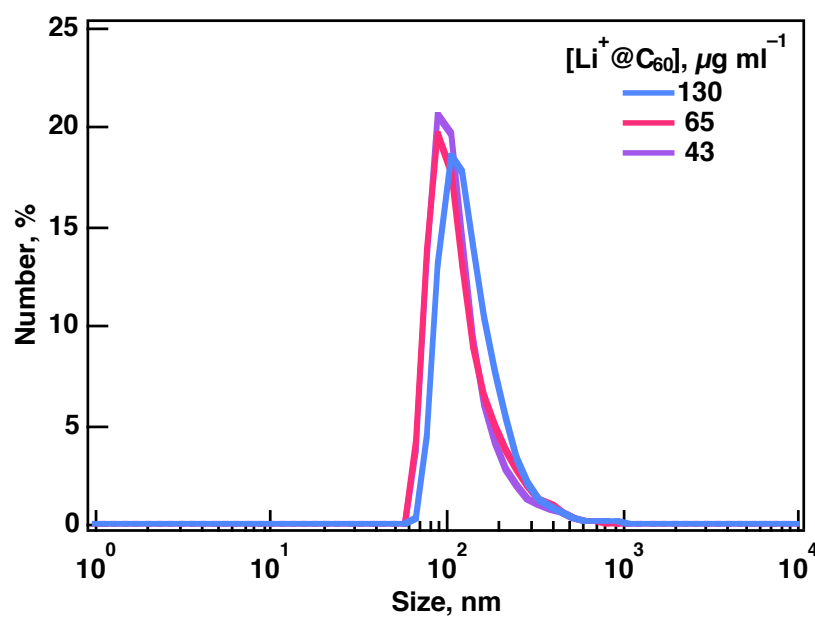

**Fig. S2** Size distribution diagram of  $\text{Li}^+@\text{C}_{60}$  at indicated concentrations in water.

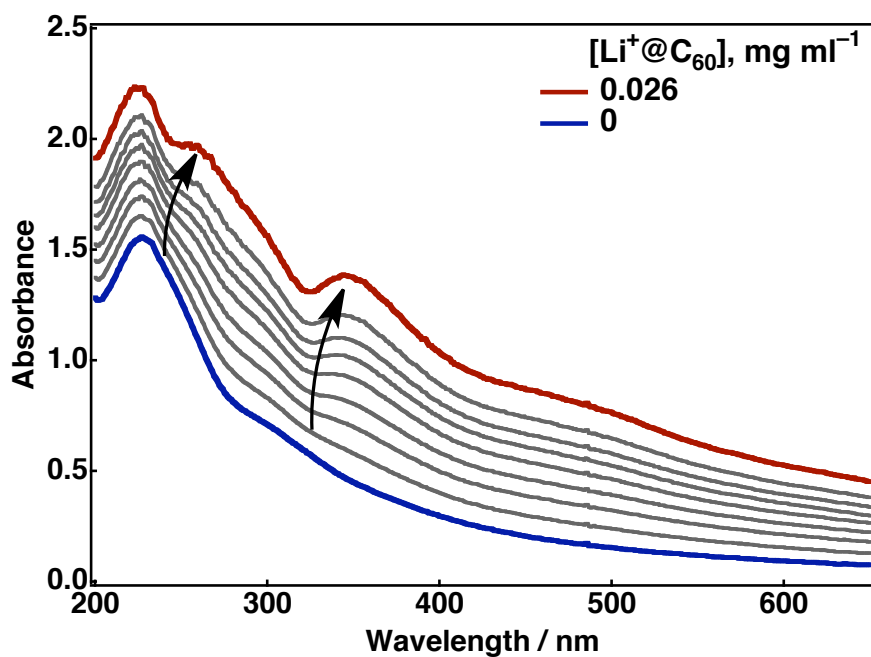

**Fig. S3** Absorption spectral changes upon the titration of 0.018 mg ml<sup>-1</sup> GO by Li<sup>+</sup>@C<sub>60</sub> aqueous dispersion.

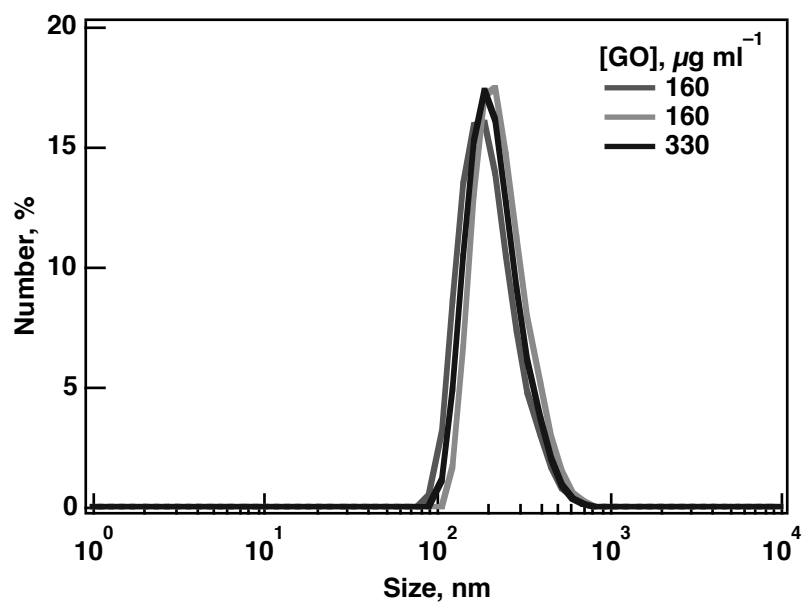

**Fig. S4** Size distribution diagram of GO at indicated concentrations in water.

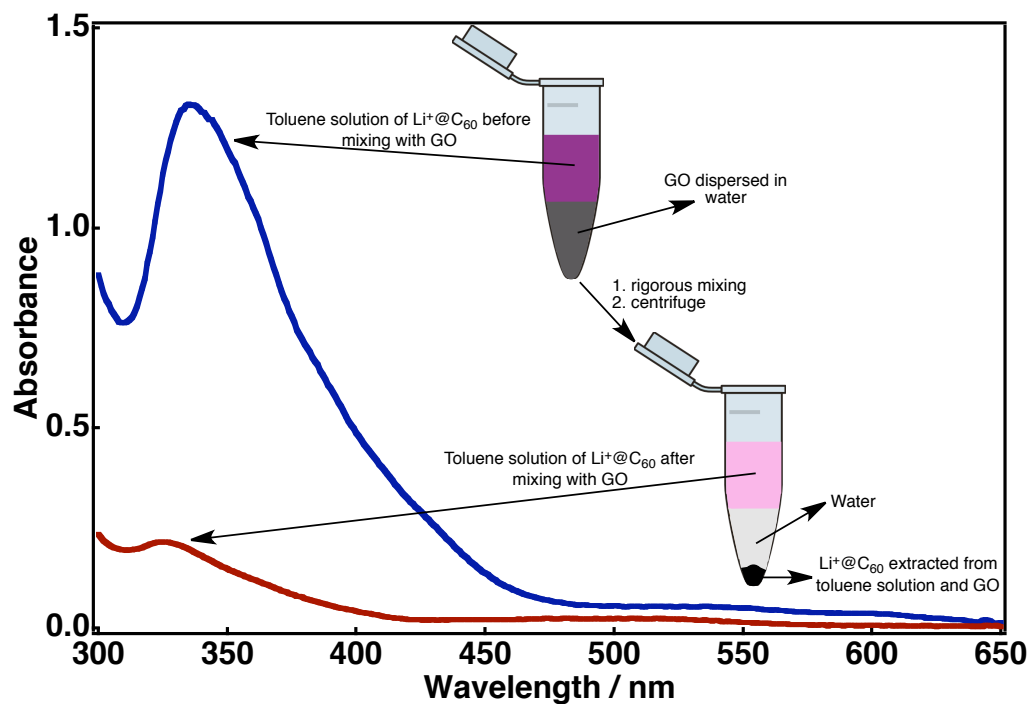

**Fig. S5** Absorption spectra of toluene solution of 0.036 mM  $\text{Li}^+\text{@C}_{60}$  before and after mixing with GO aqueous dispersion. The inset describes the mixing process.

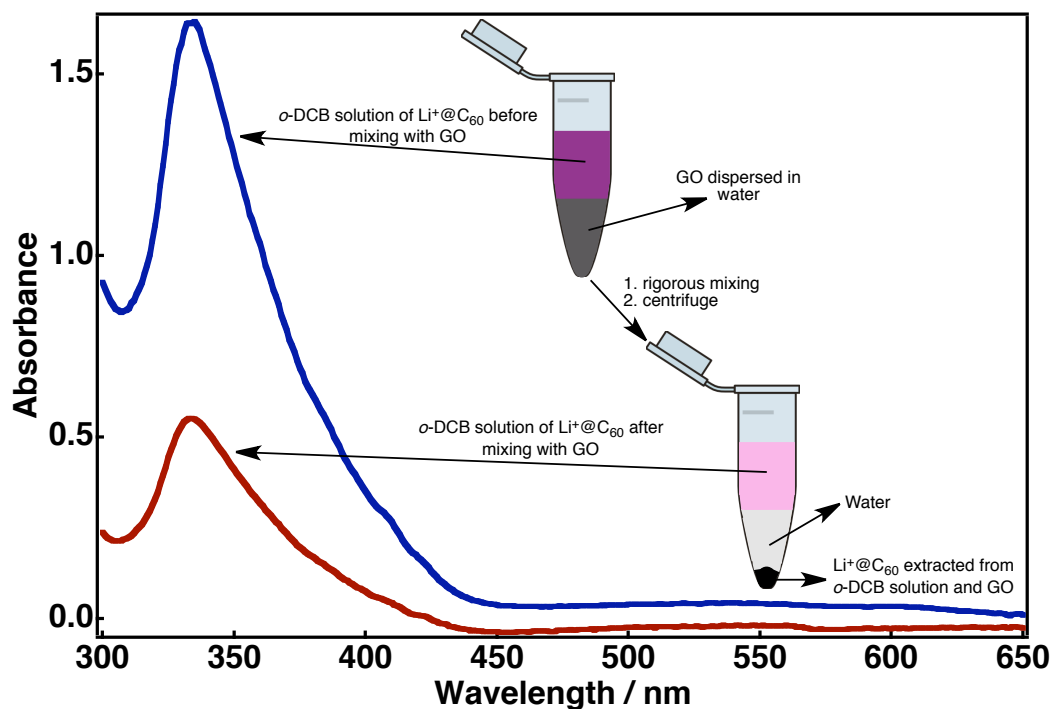

**Fig. S6** Absorption spectra of *o*-DCB solution of 0.036 mM  $\text{Li}^+\text{@C}_{60}$  before and after mixing with GO aqueous dispersion. The inset describes the mixing process.

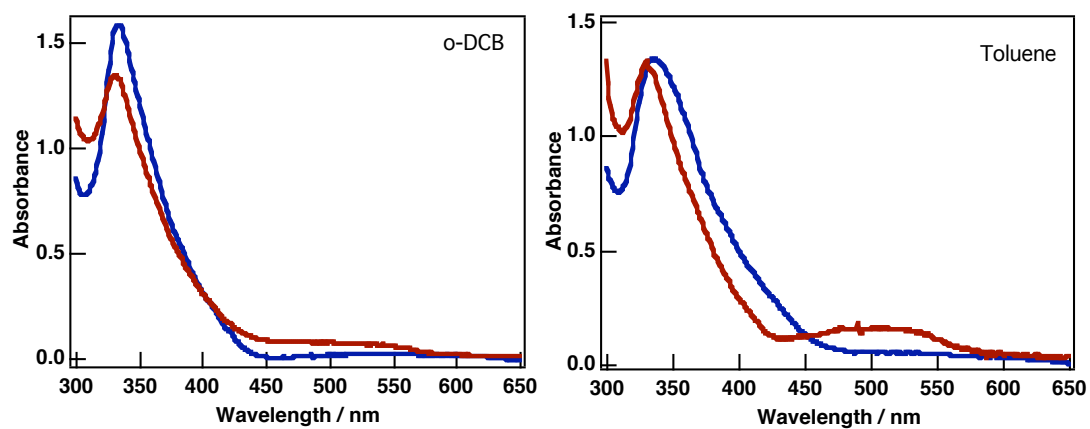

**Fig. S7** Absorption spectra of *o*-DCB solution of 0.036 mM  $\text{Li}^+@\text{C}_{60}$  before and after mixing with only water.

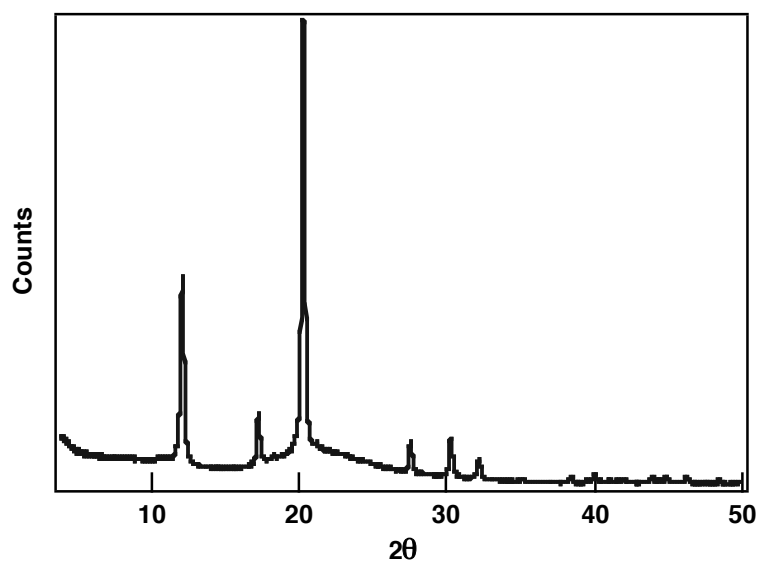

**Fig. S8** Powder X-ray diffraction patterns of dried  $\text{Li}^+@\text{C}_{60}$  nanoparticles obtained from dispersion in water.

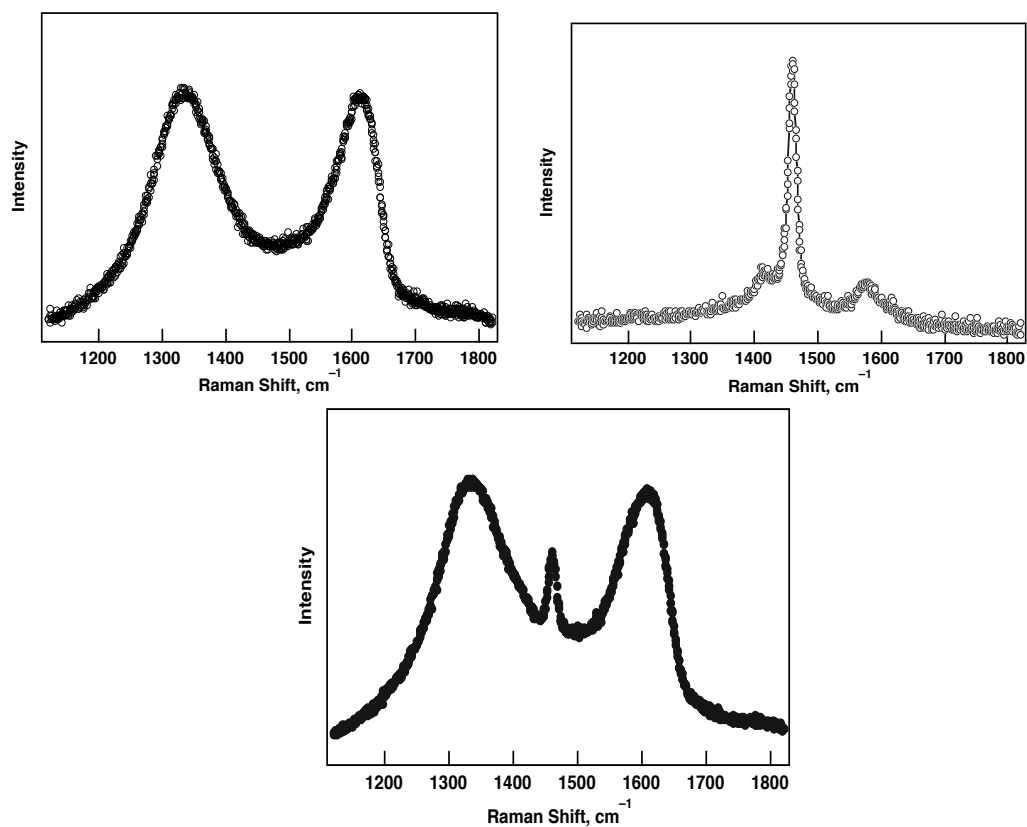

**Fig. S9** Raman spectra of GO (top left), Li<sup>+</sup>@C<sub>60</sub> (top right), and GO-Li<sup>+</sup>@C<sub>60</sub> composite (bottom).

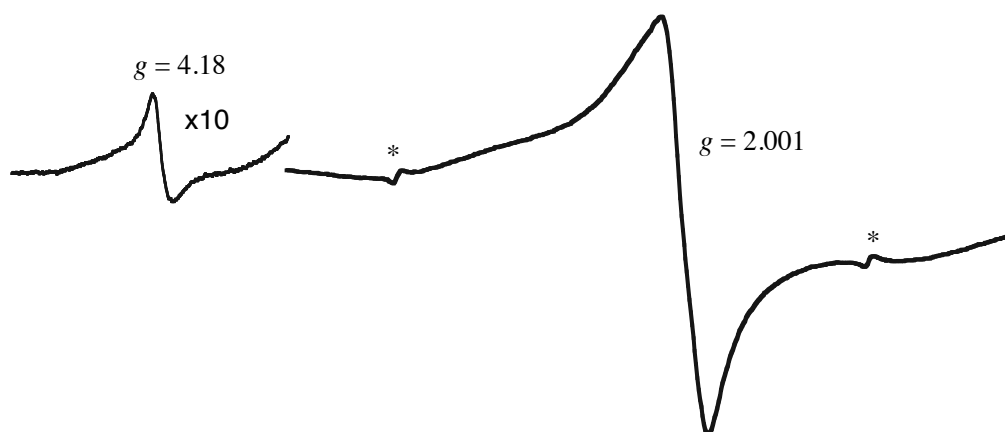

**Fig. S10** EPR spectra of GO-Li<sup>+</sup>@C<sub>60</sub> composite in water showing the triplet signal of Li<sup>+</sup>@C<sub>60</sub> and the radical ion pair with corresponding  $g$  values at 4 K observed after photoirradiation.

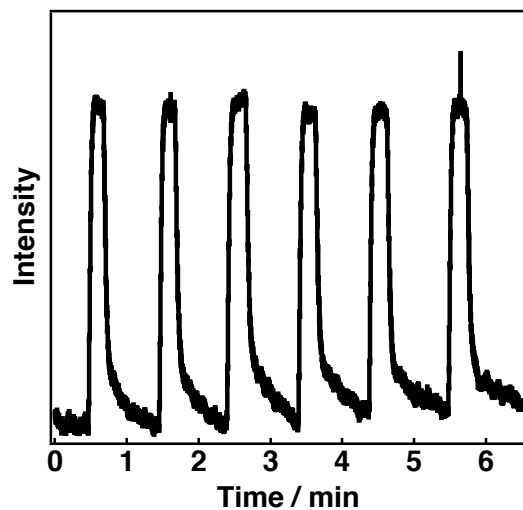

**Fig. S11** On-off switching of EPR signal intensity by switching of photoirradiation at 77 K.

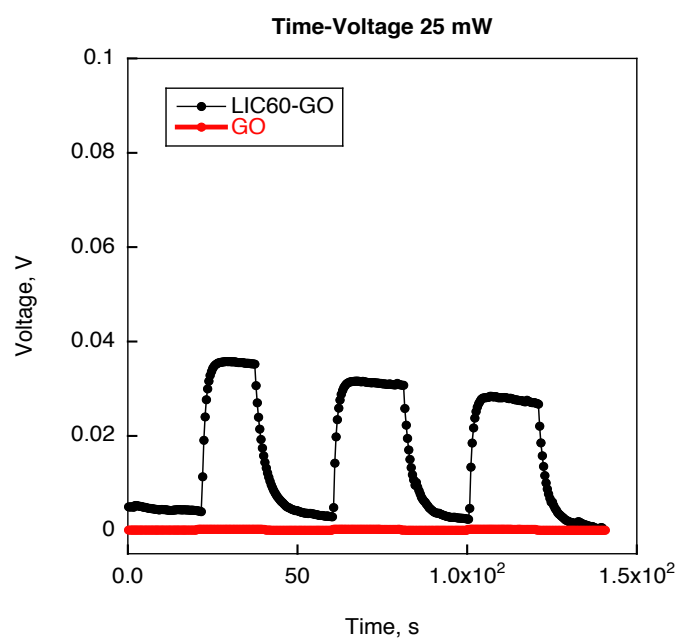

**Fig. S12** Photocurrent (left) and photovoltage (right) responses of OTE/SnO<sub>2</sub>-(GO)<sub>n</sub> and OTE/SnO<sub>2</sub>-(GO-Li<sup>+</sup>@C<sub>60</sub>)<sub>n</sub>. Electrolyte: 0.5 M LiI and 0.01 M I<sub>2</sub> in MeCN-PhCN (3 : 1 v/v).
